# Supplementary material for: Synthesis of a four-coordinate titanium(iv) oxoanion via deprotonation and decarbonylation of complexed formate
Source: Royal Society of Chemistry journal article supplement (doi:10.1039/b504492h), 2005-01-01
Supplement: b504492h.pdf [file b504492h.pdf]

**General Considerations:** Unless stated otherwise, all operations were performed in a Vacuum Atmospheres drybox under an atmosphere of purified nitrogen. Anhydrous diethyl ether was purchased from Mallinckrodt; pentane, n-hexane, and tetrahydrofuran (THF) were purchased from EM Science. Diethyl ether, toluene, benzene, pentane, and n-hexane were dried and deoxygenated by the method of Grubbs.<sup>1</sup> THF was distilled under nitrogen from purple sodium benzophenone ketyl. Distilled solvents were transferred under vacuum into vacuum-tight glass vessels before being pumped into a Vacuum Atmospheres drybox. C<sub>6</sub>D<sub>6</sub> was purchased from Cambridge Isotopes and were degassed and dried over 4 Å sieves. The 4 Å sieves, alumina, and Celite were dried in vacuo overnight at a temperature just above 200° C. Compound **1** was prepared as reported in reference 12 in the main text. *t*-Butyl formate was passed through alumina and stored over molecular sieves. All other compounds were used as received. <sup>1</sup>H and <sup>13</sup>C NMR spectra were recorded on Unity 300, Mercury 300 or Varian INOVA501 spectrometers at room temperature, unless indicated otherwise. Chemical shifts are reported with respect to internal solvent: 7.15 ppm and 128.38 (t) ppm (C<sub>6</sub>D<sub>6</sub>). CHN analyses were performed by H. Kolbe Mikroanalytisches Laboratorium (Mülheim, Germany).

**Synthesis of (Ar[*t*-Bu]N)<sub>3</sub>TiOC(O)H (**2**):** Ti(N[*t*-Bu]Ar)<sub>3</sub> (700 mg, 1.21 mmol) was dissolved in 50 mL of pentane. To the green solution was added *t*-butyl formate (124 mg, 1.21 mmol) in 5 mL of pentane resulting in an immediate darkening. The solution was allowed to stir for 30 m, and then volatiles were removed in vacuo. The resulting bright yellow solid was transferred to a fine frit and washed with pentane until the washings were clear. Yield: 614 mg, 81%. <sup>1</sup>H NMR, 500 MHz (C<sub>6</sub>D<sub>6</sub>): 1.26 (s, 27H, *t*-Bu); 2.16 (s, 18H, Ar-CH<sub>3</sub>); 6.22 (br s, 6H, *o*-ArH); 6.69 (s, 3H, *p*-ArH); 8.36 (br s, 1H, OC(O)-H) ppm. <sup>13</sup>C NMR, 125 MHz (C<sub>6</sub>D<sub>6</sub>): 21.95 (C(CH<sub>3</sub>)<sub>3</sub>); 30.94 (Ar-CH<sub>3</sub>); 62.69 (C(CH<sub>3</sub>)<sub>3</sub>); 127.36; 128.10; 137.14; 151.75; 162.05 (OC(O)H) ppm. IR (C<sub>6</sub>D<sub>6</sub>, 25 °C): 2783 (w), 1685 (s), 1231 (s), 1206 (s) cm<sup>-1</sup>. Anal Calcd. for C<sub>37</sub>H<sub>55</sub>N<sub>3</sub>O<sub>2</sub>Ti: C, 71.48; H, 8.92; N, 6.76. Found: C, 71.28; H, 8.96; N, 6.68.

---

<sup>1</sup> Pangborn, A.B.; Giardello, M.A.; Grubbs, R.H.; Rosen, R.K.; Timmers, F.J. *Organometallics* 1996, **15**, 1518.

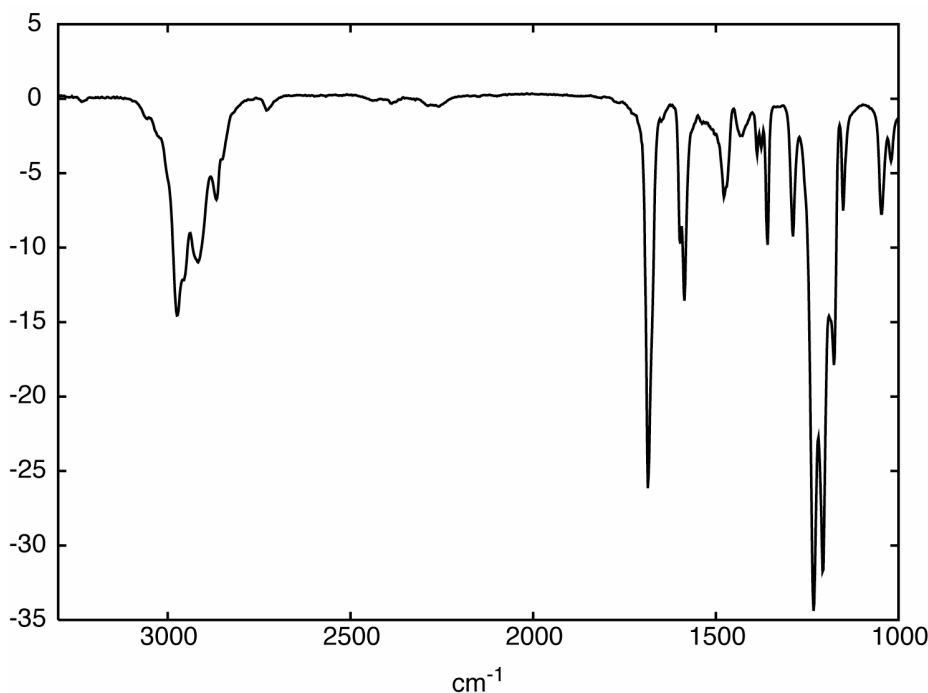

**Figure 1:** IR spectrum of **2** in C<sub>6</sub>D<sub>6</sub>.

**Synthesis of (Ar[*t*-Bu]N)<sub>3</sub>TiOLi(Et<sub>2</sub>O)<sub>2</sub> (**3**):** Titanium formate **2** (420 mg, 0.68 mmol) was slurried in 20 mL of Et<sub>2</sub>O in a 100 mL round-bottom flask and frozen in the glovebox coldwell. In a 20 mL scintillation vial, LiN(*i*-Pr)<sub>2</sub> was dissolved in 5 mL Et<sub>2</sub>O and similarly frozen. The thawing solutions were combined and allowed to warm to room temperature. After 1 h, the reaction mixture was orange and nearly homogenous. The solution was filtered through Celite, concentrated to a volume of 10 mL, and stored at -35 °C. Large block-shaped crystals grew within hours and could be isolated simply by decanting off the mother liquor. Yield: 302 mg, 60% (three crops). <sup>1</sup>H NMR, 300 MHz (C<sub>6</sub>D<sub>6</sub>): 1.39 (s, 27H, *t*-Bu); 2.32 (s, 18H, Ar-CH<sub>3</sub>); 6.70 (s, 6H, *o*-ArH); 6.76 (s, 3H, *p*-ArH) ppm. <sup>13</sup>C NMR, 125 MHz (C<sub>6</sub>D<sub>6</sub>): 22.19 (C(CH<sub>3</sub>)<sub>3</sub>); 32.78 (Ar-CH<sub>3</sub>); 58.28 (C(CH<sub>3</sub>)<sub>3</sub>); 126.01; 129.28; 137.41; 153.68 ppm. Anal Calcd. for C<sub>44</sub>H<sub>74</sub>N<sub>3</sub>O<sub>3</sub>TiLi: C, 70.66; H, 9.97; N, 5.62. Found: C, 70.23; H, 9.89; N, 5.72.

**Quantification of CO evolution in the synthesis of **3**:** In the glovebox, a 25 mL Schlenk tube (**A**) fitted with Teflon stopcock was charged with **2** and LiN(*i*-Pr)<sub>2</sub> and sealed. A 50 mL round-bottom flask (**B**) was charged with (PPh<sub>3</sub>)<sub>3</sub>RhCl and 10 mL of toluene, fitted with a 180° degree adapter, and sealed. Both flasks were removed from the glovebox, attached to a high vacuum manifold, and thoroughly evacuated. The Et<sub>2</sub>O from flask **B** was condensed into flask **A** at -196° C. Flask **A** was sealed and allowed to warm to room temperature. After 1h, flask **B** was cooled to -196° C and the volatiles from flask **A** were allowed to condense into flask **B**. Flask **B** was sealed and allowed to warm to room temperature, whereupon it turned purple. <sup>31</sup>P NMR analysis of the contents of flask **B** revealed the formation of (PPh<sub>3</sub>)<sub>2</sub>Rh(CO)Cl.
